# Supplementary material
Source: HighWire-hosted journal article supplement (https://gut.bmj.com/content/71/10/2030)
Supplement: inline-supplementary-material-2 [file inline-supplementary-material-2.xlsx]

## Sheet: PDAC
ID	Gender (M/F)	Age	Differentiation (1-well, 2-moderate,3-poorly)	Location	Death (1-yes, 0-no)	OS since diagnosis (months)	CA19.9 (kU/l)
00B02995	F	68	3	head	N/A	N/A	N/A
00B05116	M	74	3	head	N/A	N/A	<2
00B05938	M	59	1	head	N/A	N/A	N/A
00B06672	F	68	3	head	N/A	N/A	33.2
01B04753	F	67	1	head	N/A	N/A	N/A
01B04836	M	68	1	corpus	N/A	N/A	N/A
01B10279	F	73	1	head	1	0.193548	N/A
02B00609	F	72	1	corpus	N/A	N/A	84
02B04704	M	56	2	head	N/A	N/A	1590.1
02B04793	M	71	1	head	N/A	N/A	11357
02B12465	F	71	2	head	N/A	N/A	16.02
03B07761	F	71	2	head	1	1.51613	464
03B13477	M	74	3	head	1	23.6129	447
05B11078	F	63	1	tail	N/A	N/A	N/A
06B13061	F	59	3	head	1	21.4839	55.1
07B05903	F	74	2	tail	1	23.1613	176.4
07B08745	F	58	2	head	1	29.6774	<2
07B10111	M	43	3	head	1	1.06452	17.8
07B10409	M	73	3	head	N/A	N/A	N/A
07B12048	M	63	3	head	1	22.8065	49
07B14127	F	80	1	tail	1	12.7419	31.4
08B07184	F	70	2	head	N/A	N/A	58.6
08B09120	F	50	2	corpus	1	19.3548	<2
08B12014	F	78	1	head	N/A	N/A	139.7
08B14198	F	68	2	head	N/A	N/A	21.2
08B15411	F	52	3	head	1	12.9677	310.6
08B15721	M	67	1	head	1	94.6129	117
09B05504	F	78	2	tail	1	0.548387	N/A
09B07182	M	40	1	head	N/A	N/A	97.3
09B07457	M	49	2	head	1	12.5806	<2
09B08095	M	71	1	head	1	7.35484	N/A
09B10850	M	56	1	head	N/A	N/A	N/A
10B02806	M	62	2	head	1	49.8065	225.8
10B03686	F	61	2	head	1	7.93548	1463.8
10B08630	M	56	2	tail	1	21.3871	206.1
10B12648	M	70	3	head	N/A	N/A	N/A
10B13578	M	56	2	tail	1	13.4516	180.9
10B14360	F	73	2	head	1	11.2581	<2
10B15266	F	75	1	head	1	1.87097	561.3
12B00584 (12B17908)	F	66	3	head	N/A	N/A	N/A
13B02538	F	64	2	head	N/A	N/A	64.2
13B03832	M	71	2	head	1	19.7097	207
13B06585	M	73	2	head	N/A	N/A	415
13B07789	F	72	3	head	1	2.64516	728.4
13B08113	M	78	2	tail	N/A	N/A	739.5
13B09858	M	73	2	head	1	92.9355	15.2
14B00995	M	78	1	head	1	87.1613	<2
14B02963	M	74	2	head	1	2.77419	1990.2
14B03776	F	75	2	head	1	11.9355	282
14B03971	F	48	3	head	N/A	N/A	N/A
14B09985	F	57	1	tail	N/A	N/A	111.6
14B12317	F	67	3	head	1	79.5806	3529.2
14B13605	M	78	1	tail	1	4.03226	24.6
14B17059	M	64	3	head	1	76.9032	584.6
15B03514	F	75	3	head	1	73.0323	50.5
15B05289	M	77	2	tail	1	0.258065	1975
15B11817	M	64	2	head	1	109.194	97.3
17B02365	M	46	3	head	1	50.6774	283.2
17B02436	M	68	3	head	1	50.8387	137.4
17B04560 (17B03127)	M	56	3	head	1	49.3548	250.2
96B09928	M	49	1	head	1	10	107
97B03129	M	64	1	head	N/A	N/A	2295
97B04658	M	54	2	head	1	21.6774	327
97B07802	M	62	3	N/A	N/A	N/A	13.8
97B13701	F	75	3	head	1	9.74194	1819.4
98B01029	M	77	2	head	1	10.2258	35.2
98B08805	F	71	2	head	N/A	N/A	91.7
98B12648	F	63	1	head	1	10.2258	212
99B01435	M	73	1	head	N/A	N/A	N/A
99B02865	M	50	3	head	1	10.0645	400
99B07317	M	48	1	head	1	4	319.9
99B14190	F	56	1	head	1	15	210
05H05234	F	70	1	head	1	36	N/A
05H14038	M	74.5	2	head	1	1	N/A
05H14707	M	50.15	1	corpus	1	122	14
06H05131	M	55.9	2	head	1	4	160
06H16022	M	67.74	2	head	1	24	2644
07H07512	F	74.4	3	head	1	15	246
07H10130	F	63.93	1	head	1	15	314
07H14725	M	51	1	head	1	0	405
07H18780	M	71.24	1	corpus and tail	1	14	1033
08H02642	M	54.89	2	head	1	34	154.9
08H07929	F	64.95	2	head	1	9	13306
08H09407	M	47.86	3	head	1	8	313
08H12579	F	68.6	2	tail	1	45	N/A
08H15462	M	66.15	1	head	1	49	138.6
09H03302	M	69.6	2	N/A	1	15	159.4
09H11005	M	72.5	3	head	1	12	1000
09H15156	M	70	1	uncinate process	1	23	2040
10H00906	F	49	3	head	1	36	9.4
10H04373	F	60	3	uncinate process	1	20	297.9
10H12484	F	71	2	head	1	10	70
10H12861	F	79	2	head	1	7	580
10H16557	M	61	2	head	1	73	375
11H01174	F	77	1	head	1	40	788.7
11H10218	M	74	3	head	1	6	320
11H10753	M	59	2	head	1	24	N/A
11H12513	F	87	2	head	1	8	650
12H00187	M	81	2	head	1	18	252.6
12H01304	M	67	3	head	1	20	880
12H01607	M	53	2	head	1	21	1400
13H00235	M	77.2	3	head	1	9	130
13H01851	M	66.5	2	head	1	2	119
13H05556	M	84.3	2	head	1	40	680
13H07613	M	50.9	3	N/A	1	17	1795
13H07853	F	77.4	3	head	1	7	400
13H09568	F	83	3	head	1	35	2.9
13H17121	M	47	3	tail	1	20	960
14H05679	F	68	1	head	1	46	35
14H08180	F	69.11	2	head	1	22	1
14H15259	F	49.7	3	head	1	16	260
14H16377	F	85.1	3	corpus	1	5	130
15H03111	F	59.11	3	head	1	34	N/A
15H03840	F	73	3	head	1	7	81
15H05680	M	67.4	3	head	1	10	67
15H08581	M	59.9	3	head	1	45	182
15H13980	F	68	3	head	1	1	N/A
15H14622	M	37	3	head	1	20	28
15H16711	F	44.7	2	head	1	16	855
16H05839	M	48.9	3	head	1	0	250
16H06245	F	77.2	3	head	1	12	381
16H14020	F	70	3	corpus and tail	1	8	515
17H04197	F	61	2	tail	1	21	150
17H06058	M	70	3	head	1	17	38.26
18H05095	N/A	N/A	3	head	1	N/A	260
